# Supplementary figures and images for: Boredom Makes Me Sick: Adolescents’ Boredom Trajectories and Their Health-Related Quality of Life
Source: MDPI journal article supplement (doi:10.3390/ijerph18126308), 2021-06-10

Boredom relationship with HRQoL across genders

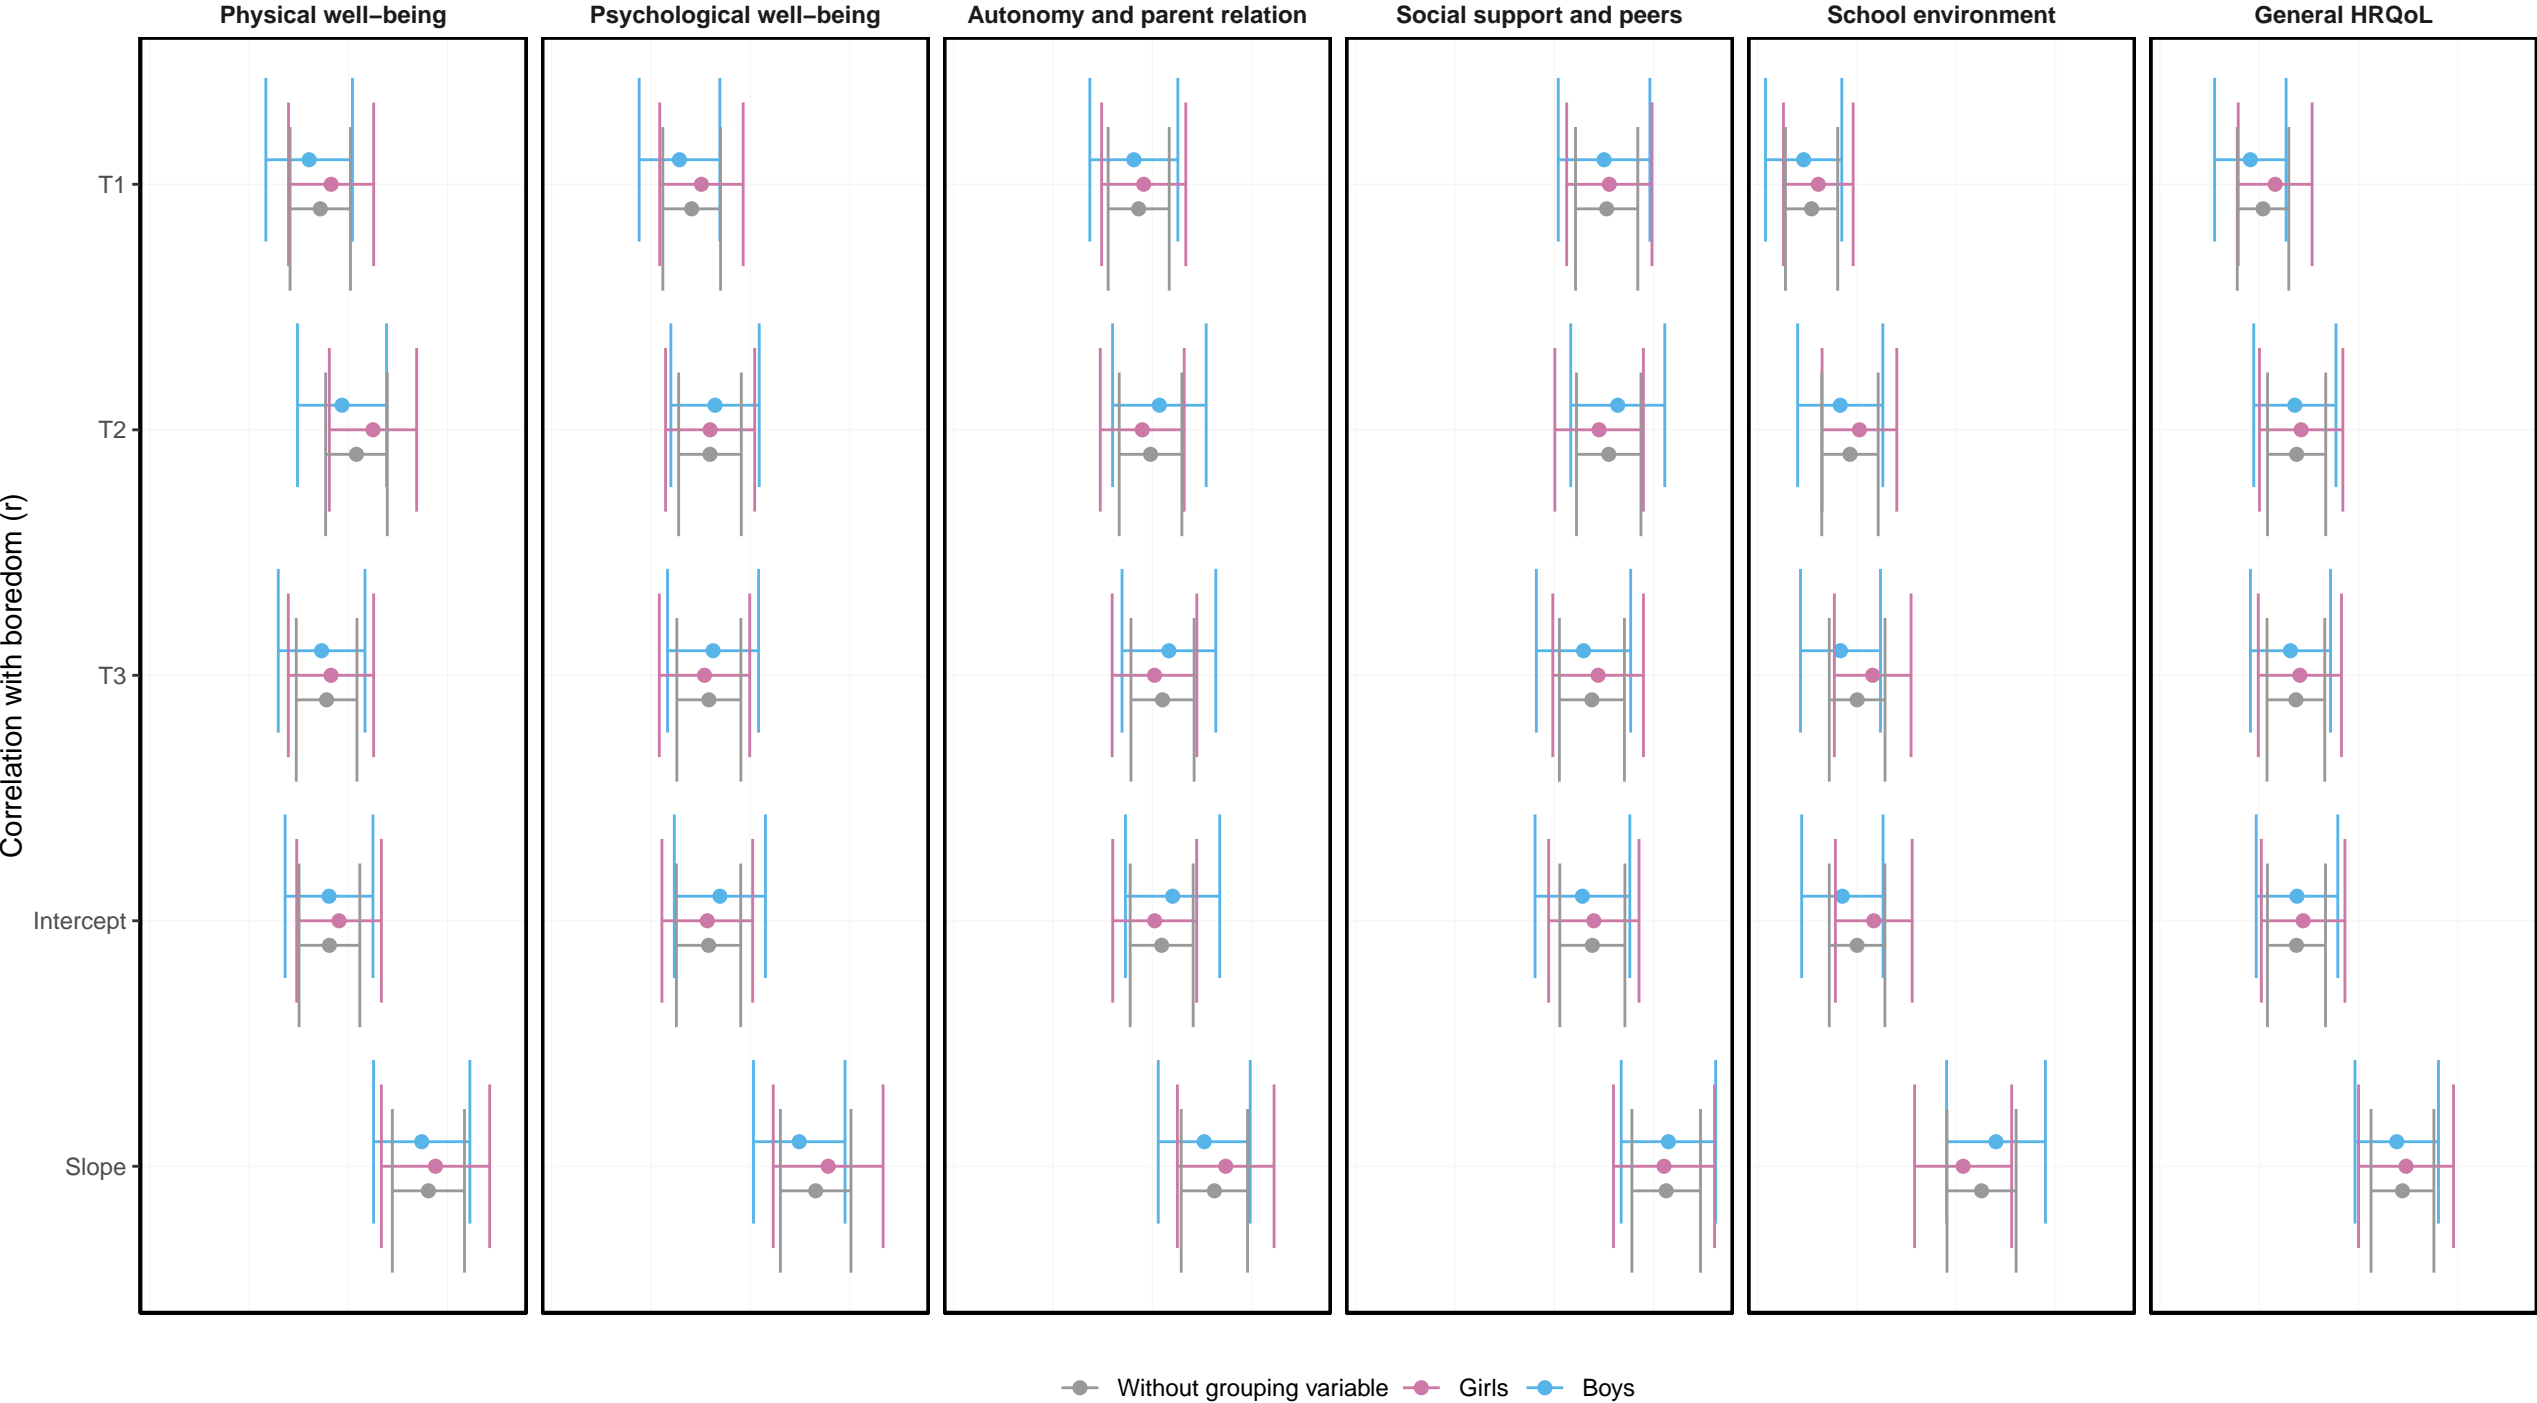

Supplement: s1 [file s1]
